# Supplementary material
Source: PubMed Central journal article supplement (PMC3538386)
Supplement: mmc1.pdf [file mmc1.pdf]

Supplementary Table 1. Proportion of HCV Etiology in Different Age Groups

|              | <b>1976-1990</b><br>(n=29) | <b>1991-2000</b><br>(n=28) | <b>2001-2008</b><br>(n=47) |
|--------------|----------------------------|----------------------------|----------------------------|
| 20-49 (n=18) | 0 (0%)                     | 1 (14%)                    | 3 (75%)                    |
| 50-59 (n=13) | 0 (0%)                     | 1 (33%)                    | 7 (88%)                    |
| 60-69 (n=28) | 0 (0%)                     | 2 (25%)                    | 3 (33%)                    |
| ≥70 (n=45)   | 0 (0%)                     | 3 (38%)                    | 8 (31%)                    |

Supplementary Table 2. Cause of Death in Olmsted County HCC Patients Between 1976 and 2008

|                                                          | <b>Era 1<br/>1976-<br/>1990</b><br>(n=29) | <b>Era 2<br/>1991-<br/>2000</b><br>(n=28) | <b>Era 3<br/>2001-<br/>2008</b><br>(n=47) | <b>Total</b><br>(n=104)  | P <sub>trend</sub> |
|----------------------------------------------------------|-------------------------------------------|-------------------------------------------|-------------------------------------------|--------------------------|--------------------|
| <b>Death</b>                                             | 28<br>(97%)                               | 25<br>(89%)                               | 37<br>(79%)                               | 90 <sup>a</sup><br>(87%) |                    |
| <b>Progressive HCC</b>                                   | 24<br>(89%)                               | 18<br>(72%)                               | 21<br>(57%)                               | 63<br>(71%)              | <0.01              |
| <b>Controlled HCC with<br/>Progressive Liver Failure</b> | 1<br>(4%)                                 | 3<br>(12%)                                | 7<br>(19%)                                | 11<br>(12%)              | 0.07               |
| <b>Non Liver Related Death</b>                           | 2<br>(7%)                                 | 4<br>(16%)                                | 9<br>(24%)                                | 15<br>(17%)              | 0.07               |
| Cardiovascular disease                                   | 0                                         | 2                                         | 2                                         | 4                        |                    |
| Other neoplasms <sup>b</sup>                             | 0                                         | 1                                         | 2                                         | 3                        |                    |
| Respiratory disease                                      | 2                                         | 0                                         | 2                                         | 4                        |                    |
| Others <sup>c</sup>                                      | 0                                         | 1                                         | 3                                         | 4                        |                    |

<sup>a</sup> Cause of death was unknown in one patient

<sup>b</sup> Other neoplasms include lung cancer (1991-2000), metastatic squamous cell cancer, and lymphoma (2001-2008)

<sup>c</sup> Others include amyotrophic lateral sclerosis (1991-2000), intestinal perforation, renal failure, and myelofibrosis (2001-2008)

HCC=hepatocellular carcinoma
